# Supplementary material
Source: Research Square preprint supplement (doi:10.21203/rs.3.rs-10295344/v1)
Supplement: Supplementary file 1 [file 134905a999104aec58329932.docx]

# Supplementary Information

## S1. Primary structural metrics by stress

| **Stress** | **Neighbor retention** | **Basin retention** | **Path admissibility** | **Transition JS** | **Cosine displacement** |
| --- | --- | --- | --- | --- | --- |
| 0.00 | 1.000 | 1.000 | 1.000 | 0.000 | 0.00000 |
| 0.05 | 0.199 | 0.080 | 0.061 | 0.921 | 0.00087 |
| 0.10 | 0.055 | 0.040 | 0.020 | 0.970 | 0.00333 |
| 0.15 | 0.034 | 0.026 | 0.010 | 0.986 | 0.00711 |
| 0.20 | 0.027 | 0.020 | 0.004 | 0.993 | 0.01204 |
| 0.30 | 0.024 | 0.012 | 0.006 | 0.989 | 0.02470 |

## S2. Robustness design

Each analytical configuration combined one projection dimension, one projection seed, one RIX PCA dimensionality, and one quantile-bin resolution. All configurations used the same fixed-reference principle: clean geometry was fit at stress 0.00 and frozen before stressed observations were assigned.

| **Component** | **Values** |
| --- | --- |
| Projection dimensions | 32, 64, 128, 256 |
| Projection seeds | 5 deterministic seeds |
| RIX PCA dimensions | 3, 4, 5, 6 |
| RIX quantile bins | 3, 4, 5, 6 |
| Total configurations | 320 |

## S3. Behavioral calibration protocol

The closed-loop calibration used the same observation stress ladder as the offline structural study. Ten episodes were evaluated per stress level under a fixed CPU-safe CEM planner budget. Start-state and target selection procedures were held constant across the calibration protocol. Because the objective was comparative regime calibration, all stress conditions used the same computational budget.

## S4. Suggested external replication sequence

- Replicate the fixed-reference stress study on a second world-model architecture.
- Repeat the stress ladder on a second control task with different observation and action geometry.
- Test non-Gaussian stress mechanisms, including occlusion, blur, temporal lag, and structured sensor corruption.
- Predeclare the structural transition metrics and breakpoint analysis before external replication.
- Evaluate whether the same regime-level correspondence holds under higher-compute planning budgets.
